# Supplementary material for: Genomic and Phenotypic Characterization of the Nontoxigenic Clostridioides difficile Strain CCUG37785 and Demonstration of Its Therapeutic Potential for the Prevention of C. difficile Infection
Source: PubMed Central journal article supplement (PMC9045287; doi:10.1128/spectrum.01788-21), 2022-03-22
Supplement: spectrum01788-21_supp_1_seq12.pdf [file spectrum01788-21_supp_1_seq12.pdf]

## Supplementary Information:

### **Genomic and phenotypic characterization of the nontoxigenic *Clostridioides difficile* strain CCUG37785 and demonstration of its therapeutic potential for the prevention of *C. difficile* infection**

Shaohui Wang<sup>a#</sup>, Joshua Heuler<sup>a#</sup>, Ishani Wickramage<sup>a</sup>, Xingmin Sun<sup>a\*</sup>

<sup>a</sup>*Department of Molecular Medicine, Morsani College of Medicine, University of South Florida, Tampa, FL, United States.*

# Equal contribution

\* Corresponding author (sun5@usf.edu).

## Supplementary figures and figure legends

Supplementary Fig. 1. Toxin expression assay. Strain R20291 produced both TcdA and TcdB, with the highest toxin concentrations of TcdA (A) and TcdB (B) detected at 48 hours post-inoculation; Strain CCUG37785 produced neither TcdA (A) nor TcdB (B).

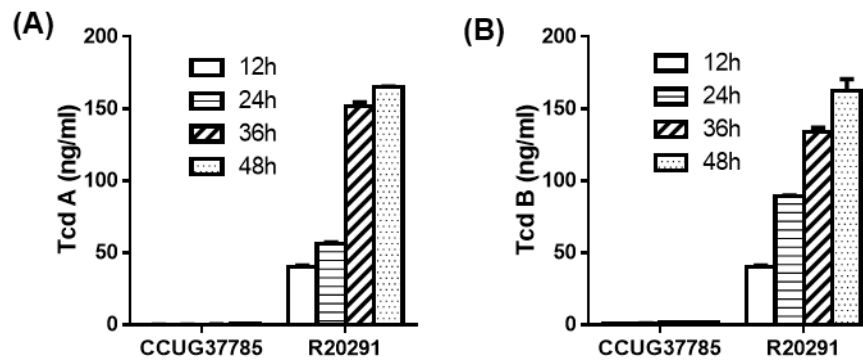

## Supplementary tables

Supplementary Table 1. BLASTn comparisons between CCUG37785 and other non-toxigenic strains. The nucleotide sequences of non-toxigenic strains in Table 1 were used as queries against CCUG37785. Searches were performed online through NCBI

(<https://blast.ncbi.nlm.nih.gov/Blast.cgi>).

| Strain   | Identity (%) | Query Cover (%) | E-value |
|----------|--------------|-----------------|---------|
| DSM28666 | 99.47        | 95              | 0       |
| DSM28669 | 99.72        | 94              | 0       |
| DSM28670 | 98.43        | 92              | 0       |
| DSM29629 | 98.41        | 91              | 0       |
| DSM29637 | 98.42        | 94              | 0       |
| DSM29688 | 99.69        | 93              | 0       |
| Z31      | 99.54        | 99              | 0       |

Supplementary Table 2. CCUG37785 prophage region 3 draft annotation. Prophage regions predicted by PHASTER were annotated using the RASTtk automated pipeline followed by curating putative protein functions using NCBI BLASTp searches. All matches displayed at least 80% sequence identity with the query amino acid sequence.

| ORF | Start | Stop  | Strand | Putative Function                           | E-value   |
|-----|-------|-------|--------|---------------------------------------------|-----------|
| 1   | 1335  | 205   | -      | site-specific integrase                     | 0         |
| 2   | 2081  | 1575  | -      | ImmA/IrrE family metallo-endopeptidase      | 2.00E-114 |
| 3   | 2705  | 2157  | -      | helix-turn-helix domain-containing protein  | 4.00E-124 |
| 4   | 3058  | 2717  | -      | XRE family transcriptional regulator        | 1.00E-77  |
| 5   | 3235  | 3438  | +      | helix-turn-helix domain-containing protein  | 6.00E-39  |
| 6   | 3486  | 4295  | +      | phage antirepressor                         | 0         |
| 7   | 4342  | 4551  | +      | hypothetical protein                        | 6.00E-41  |
| 8   | 4935  | 4561  | -      | DUF6173 family protein                      | 2.00E-85  |
| 9   | 5011  | 5208  | +      | helix-turn-helix transcriptional regulator  | 7.00E-36  |
| 10  | 5239  | 5631  | +      | helix-turn-helix domain-containing protein  | 5.00E-85  |
| 11  | 5618  | 5761  | +      | hypothetical protein                        | 2.00E-20  |
| 12  | 5832  | 6257  | +      | hypothetical protein                        | 5.00E-89  |
| 13  | 6269  | 7435  | +      | DUF2800 domain-containing protein           | 0         |
| 14  | 7450  | 7785  | +      | hypothetical protein                        | 4.00E-71  |
| 15  | 7838  | 8410  | +      | DNA-directed RNA polymerase sigma-70 factor | 4.00E-135 |
| 16  | 8433  | 9005  | +      | DUF2815 family protein                      | 1.00E-36  |
| 17  | 9005  | 10963 | +      | DNA polymerase                              | 0         |
| 18  | 10975 | 13392 | +      | virulence-associated E family protein       | 0         |
| 19  | 13674 | 14000 | +      | VRR-NUC domain-containing protein           | 3.00E-70  |
| 20  | 14030 | 15319 | +      | DEAD/DEAH box helicase family protein       | 0         |
| 21  | 15343 | 15480 | +      | hypothetical protein                        | 9.00E-32  |
| 22  | 15473 | 15952 | +      | helix-turn-helix domain-containing protein  | 3.00E-107 |
| 23  | 16091 | 16348 | +      | hypothetical protein                        | 1.00E-51  |
| 24  | 16536 | 17579 | +      | AAA family ATPase                           | 0         |
| 25  | 17580 | 19802 | +      | S8 family peptidase                         | 0         |
| 26  | 19960 | 20643 | +      | phage terminase small subunit               | 7.00E-164 |
| 27  | 20633 | 21874 | +      | PBSX family phage terminase large subunit   | 0         |
| 28  | 21880 | 23319 | +      | portal                                      | 0         |
| 29  | 23309 | 24802 | +      | portal                                      | 0         |
| 30  | 24768 | 25010 | +      | minor capsid                                | 0         |
| 31  | 25320 | 25883 | +      | hypothetical protein                        | 6.00E-48  |
| 32  | 25895 | 26785 | +      | phage scaffolding protein                   | 6.00E-131 |
| 33  | 26804 | 27037 | +      | capsid protein                              | 0         |
| 34  | 27047 | 27448 | +      | hypothetical protein                        | 4.00E-90  |
| 35  | 27442 | 27789 | +      | hypothetical protein                        | 3.00E-77  |
| 36  | 27789 | 28214 | +      | HK97 gp10 family phage protein              | 3.00E-100 |
| 37  | 28207 | 28644 | +      | hypothetical protein                        | 2.00E-99  |
| 38  | 28637 | 28813 | +      | hypothetical protein                        | 8.00E-32  |
| 39  | 28814 | 30124 | +      | phage tail sheath family protein            | 0         |

Continued.

Table 2 Cont.

| ORF | Start | Stop  | Strand | Putative Function                                        | E-value   |
|-----|-------|-------|--------|----------------------------------------------------------|-----------|
| 40  | 30141 | 30611 | +      | phage tail tube protein                                  | 2.00E-111 |
| 41  | 30683 | 31123 | +      | phage portal protein                                     | 2.00E-102 |
| 42  | 31198 | 31317 | +      | hypothetical protein                                     | 8.00E-16  |
| 43  | 31966 | 32070 | +      | hypothetical protein                                     | 2.00E-14  |
|     | 32363 | 32391 | +      | CRISPR repeat with sequence gtttagattaactatatggaatgtaa   |           |
|     | 32363 | 32810 | +      | CRISPR region with repeat gtttagattaactatatggaatgtaa     |           |
|     | 32392 | 32428 | +      | CRISPR spacer                                            |           |
|     | 32429 | 32457 | +      | CRISPR repeat with sequence gtttagattaactatatggaatgtaa   |           |
|     | 32456 | 32638 | +      | hypothetical protein                                     |           |
|     | 32458 | 32495 | +      | CRISPR spacer                                            |           |
|     | 32496 | 32524 | +      | CRISPR repeat with sequence gtttagattaactatatggaatgtaa   |           |
|     | 32525 | 32561 | +      | CRISPR spacer                                            |           |
|     | 32562 | 32590 | +      | CRISPR repeat with sequence gtttagattaactatatggaatgtaag  |           |
|     | 32591 | 32626 | +      | CRISPR spacer                                            |           |
|     | 32627 | 32655 | +      | CRISPR repeat with sequence gtttagattgactatatggaatgtaa   |           |
|     | 32656 | 32693 | +      | CRISPR spacer                                            |           |
|     | 32694 | 33400 | +      | CRISPR region with repeat gtttagattaactatatggaatgtaa     |           |
|     | 32694 | 32722 | +      | CRISPR repeat with sequence gtttagattaactatatggaatgtaa   |           |
|     | 32723 | 32781 | +      | CRISPR spacer                                            |           |
|     | 32782 | 32810 | +      | CRISPR repeat with sequence gtttagattaactatatggaatgtaa   |           |
|     | 32811 | 32846 | +      | CRISPR spacer                                            |           |
|     | 32847 | 32875 | +      | CRISPR repeat with sequence gtttagattaactatatggaatgtaa   |           |
|     | 32876 | 32912 | +      | CRISPR spacer                                            |           |
|     | 32913 | 32941 | +      | CRISPR repeat with sequence gtttagattaactatatggaatgtaa   |           |
|     | 32942 | 32975 | +      | CRISPR spacer                                            |           |
|     | 32976 | 33004 | +      | CRISPR repeat with sequence gtttagattaactatatggaatgtaa   |           |
|     | 33005 | 33040 | +      | CRISPR spacer                                            |           |
|     | 33041 | 33069 | +      | CRISPR repeat with sequence gtttagattaactatatggaatgtaa   |           |
|     | 33070 | 33107 | +      | CRISPR spacer                                            |           |
|     | 33108 | 33136 | +      | CRISPR repeat with sequence gtttagattaactatatggaatgtaa   |           |
|     | 33137 | 33173 | +      | CRISPR spacer                                            |           |
|     | 33174 | 33202 | +      | CRISPR repeat with sequence gtttatattaactatggtgatgtaa    |           |
|     | 33203 | 33239 | +      | CRISPR spacer                                            |           |
|     | 33240 | 33268 | +      | CRISPR repeat with sequence gtttatattaactatggtgatgtaa    |           |
|     | 33269 | 33304 | +      | CRISPR spacer                                            |           |
|     | 33305 | 33333 | +      | CRISPR repeat with sequence gtttagattaactatatggaatgtaa   |           |
|     | 33334 | 33371 | +      | CRISPR spacer                                            |           |
|     | 33372 | 33400 | +      | CRISPR repeat with sequence gtttagattaactatgtggagaaaaact |           |
| 44  | 33560 | 33730 | +      | ribbon-helix-helix domain-containing protein             | 5.00E-32  |
| 45  | 33858 | 34700 | +      | phage repressor                                          | 0         |
| 46  | 34755 | 34910 | +      | hypothetical protein                                     | 5.00E-21  |
| 47  | 35091 | 34954 | -      | hypothetical protein                                     | 9.00E-23  |
| 48  | 35467 | 36237 | +      | SHOCT domain-containing protein                          | 0         |
| 49  | 36295 | 38646 | +      | tape measure protein                                     | 0         |
| 50  | 38663 | 39358 | +      | LysM peptidoglycan-binding domain-containing protein     | 7.00E-168 |

Continued.

**Table 2 Cont.**

| <b>ORF</b> | <b>Start</b> | <b>Stop</b> | <b>Strand</b> | <b>Putative Function</b>                                     | <b>E-value</b> |
|------------|--------------|-------------|---------------|--------------------------------------------------------------|----------------|
| 51         | 39351        | 41243       | +             | NlpC/P60 family protein                                      | 0              |
| 52         | 41257        | 41517       | +             | DUF2577 domain-containing protein                            | 9.00E-54       |
| 53         | 41522        | 41941       | +             | DUF2634 domain-containing protein                            | 8.00E-96       |
| 54         | 41942        | 42991       | +             | baseplate J/gp47 family protein                              | 0              |
| 55         | 42984        | 43601       | +             | YmfQ family protein                                          | 9.00E-148      |
| 56         | 43613        | 44638       | +             | phage tail protein                                           | 0              |
| 57         | 44655        | 46196       | +             | hypothetical protein                                         | 0              |
| 58         | 46210        | 46503       | +             | hypothetical protein                                         | 1.00E-61       |
| 59         | 46503        | 46685       | +             | hypothetical protein                                         | 4.00E-34       |
| 60         | 46719        | 46910       | +             | hypothetical protein                                         | 3.00E-35       |
| 61         | 46924        | 47556       | +             | tail fiber                                                   | 2.00E-148      |
| 62         | 47567        | 47770       | +             | hypothetical protein                                         | 2.00E-35       |
| 63         | 48025        | 47795       | -             | no significant similarity found                              | n/a            |
| 64         | 48062        | 48667       | +             | tail fiber protein                                           | 1.00E-38       |
| 65         | 48691        | 48996       | +             | hypothetical protein                                         | 3.00E-61       |
| 66         | 48996        | 49160       | +             | hypothetical protein                                         | 1.00E-28       |
| 67         | 49360        | 50709       | +             | hypothetical protein                                         | 0              |
| 68         | 50709        | 50888       | +             | hypothetical protein                                         | 5.00E-33       |
| 69         | 50929        | 51159       | +             | hemolysin XhIA family protein                                | 2.00E-45       |
| 70         | 51179        | 51436       | +             | phage holin family protein                                   | 2.00E-52       |
| 71         | 51697        | 52023       | +             | abi-like family protein                                      | 5.00E-70       |
| 72         | 52063        | 52560       | +             | abi-like family protein                                      | 3.00E-15       |
| 73         | 52639        | 53451       | +             | N-acetylmuramoyl-L-alanine amidase                           | 0              |
| 74         | 53738        | 55747       | +             | cell wall-binding repeat-containing protein                  | 0              |
| 75         | 55977        | 55792       | -             | AbrB/MazE/SpoVT family DNA-binding domain-containing protein | 9.00E-34       |
| 76         | 56334        | 56206       | -             | putative membrane protein                                    | 9.00E-17       |
